# Supplementary material for: Microwell Plate-Based Dynamic Light Scattering as a High-Throughput Characterization Tool in Biopharmaceutical Development
Source: PubMed Central journal article supplement (PMC7911513; doi:10.3390/pharmaceutics13020172), 2021-01-27

Supplementary Materials

# Microwell Plate-Based Dynamic Light Scattering as a High-Throughput Characterization Tool in Biopharmaceutical Development

Katharina Dauer, Stefania Pfeiffer-Marek, Walter Kamm and Karl G. Wagner

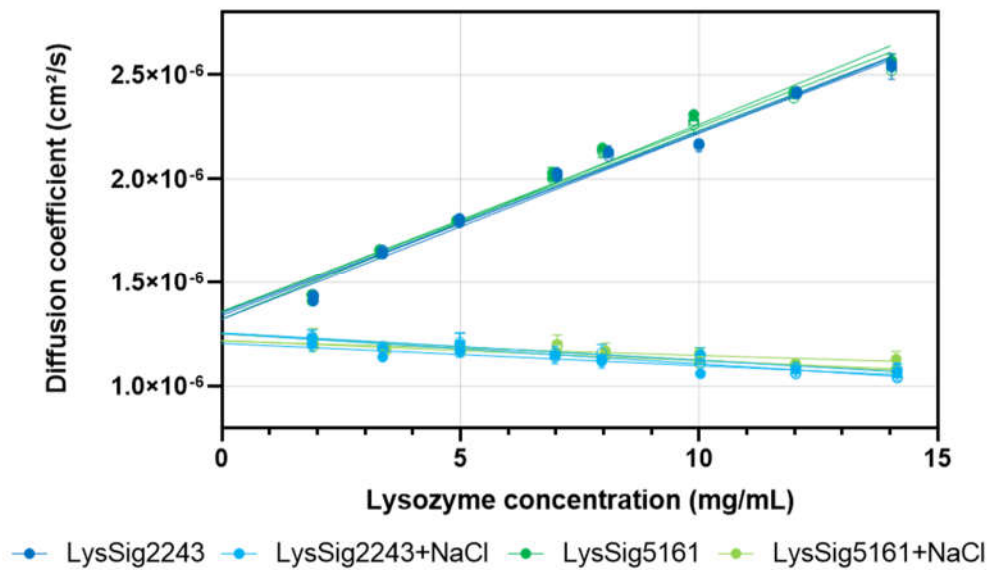

**Figure S1.** Diffusion coefficient as a function of lysozyme concentration formulated in 20 mM acetate buffer pH 4.5 in absence or presence of 400 mM NaCl. Filled circles represent  $D$  collected in upper rows, half-filled circles represent  $D$  collected in middle rows, and empty circles represent  $D$  collected in bottom rows. The y-intercept provides concentration-independent  $D_0$ . Error bars represent the standard deviation of 6 measurements for the diffusion coefficients by DLS.

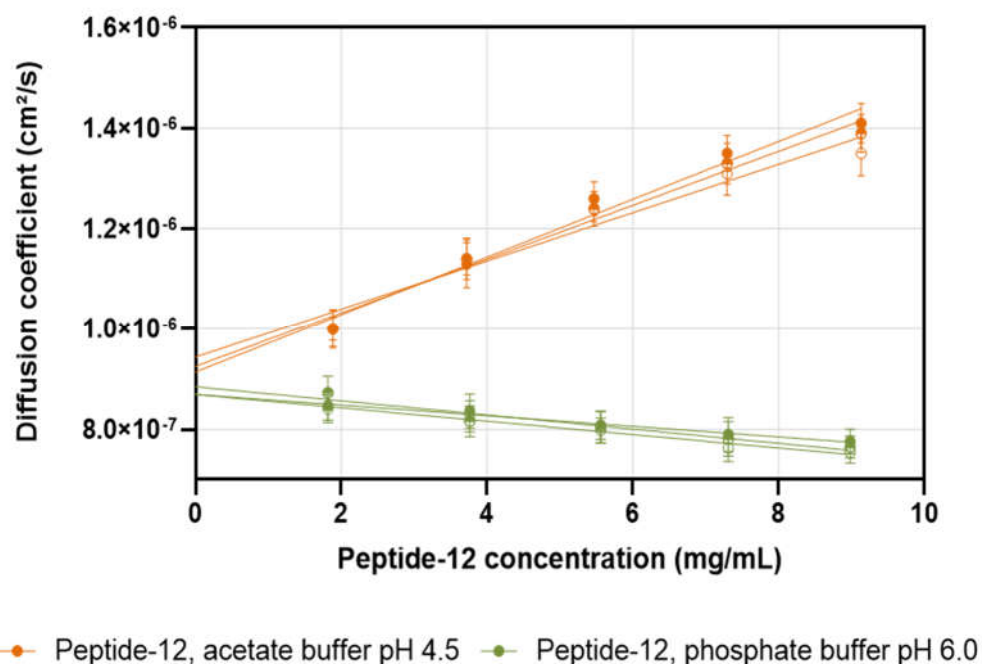

**Figure S2.** Diffusion coefficient as a function of peptide-12 concentration formulated in 30 mM buffers in absence of tonicity agents. Filled circles represent  $D$  collected in upper rows, half-filled circles represent  $D$  collected in middle rows, and empty circles represent  $D$  collected in bottom rows. The y-intercept provides concentration-independent  $D_0$ . Error bars represent the standard deviation of 6 measurements for the diffusion coefficients by DLS.

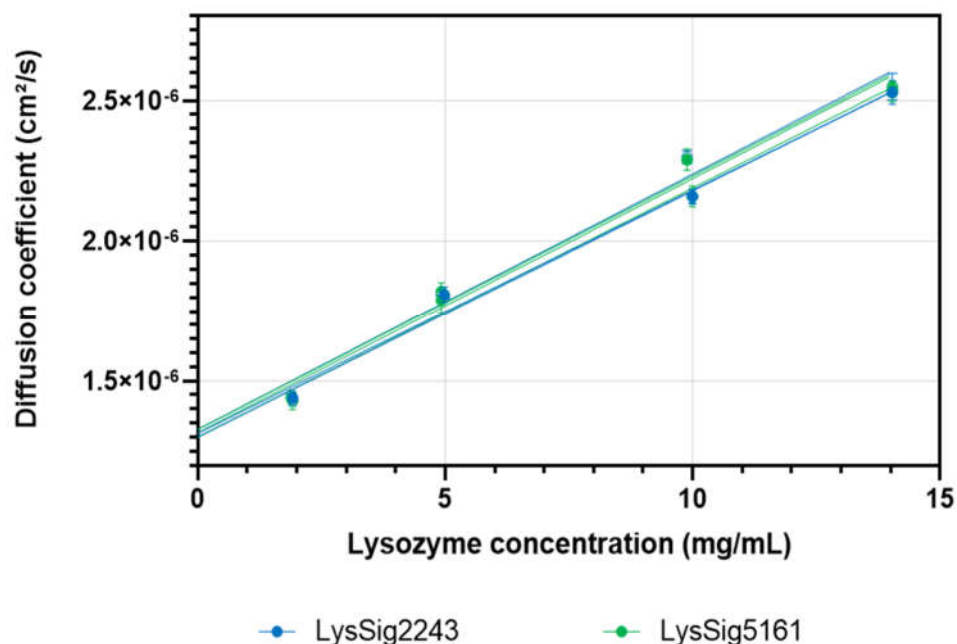

**Figure S3.** Diffusion coefficient as a function of lysozyme concentration formulated in 20 mM acetate buffer pH 4.5 (for two lysozyme batches LysSig2243: blue, LysSig5161: green). Filled circles represent  $D$  collected in run 1, half-filled circles represent  $D$  collected in run 2, and empty circles represent  $D$  collected in run 3. The y-intercept provides concentration-independent  $D_0$ . Error bars represent the standard deviation of 6 measurements for the diffusion coefficients by DLS.

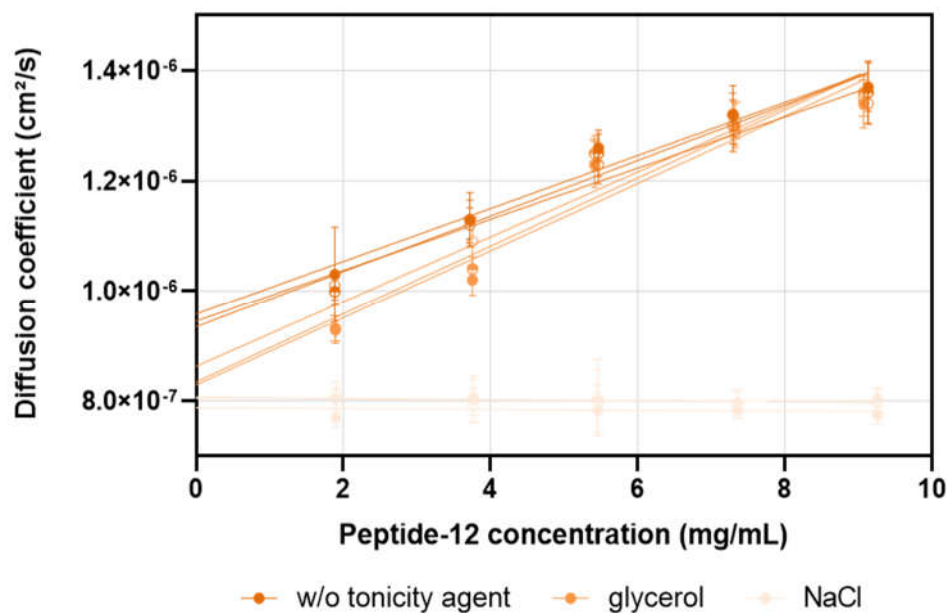

**Figure S4.** Diffusion coefficient as a function of peptide-12 concentration formulated in 30 mM buffers in absence or presence of tonicity agents (w/o tonicity agent: dark orange, glycerol: orange, NaCl: slight orange). Filled circles represent  $D$  collected in run 1, half-filled circles represent  $D$  collected in run 2, and empty circles represent  $D$  collected in run 3. The y-intercept provides concentration-independent  $D_0$ . Error bars represent the standard deviation of 6 measurements for the diffusion coefficients by DLS.

**Table S1.** DLS autocorrelation functions (ACF) for  $k_D$  analysis for lysozyme at 10 mg/mL concentration in 20 mM acetate buffer pH 4.5 in absence and presence of 400 mM NaCl. SOS (sum-of-squares) and baseline are parameters for judging the “goodness” of the autocorrelation curves. Composition code is given on left hand side

| Formulation                    | Baseline      | SOS           | ACF                                                                                   |
|--------------------------------|---------------|---------------|---------------------------------------------------------------------------------------|
| LysSig2243 AcBuffer_pH4.5_none | 1.000 ± 0.000 | 0.394 ± 0.327 | 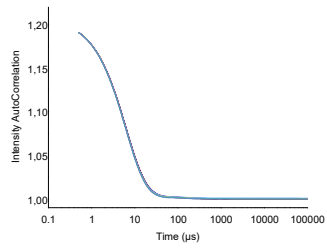 |
| LysSig2243 AcBuffer_pH4.5_NaCl | 1.000 ± 0.000 | 0.097 ± 0.102 |  |

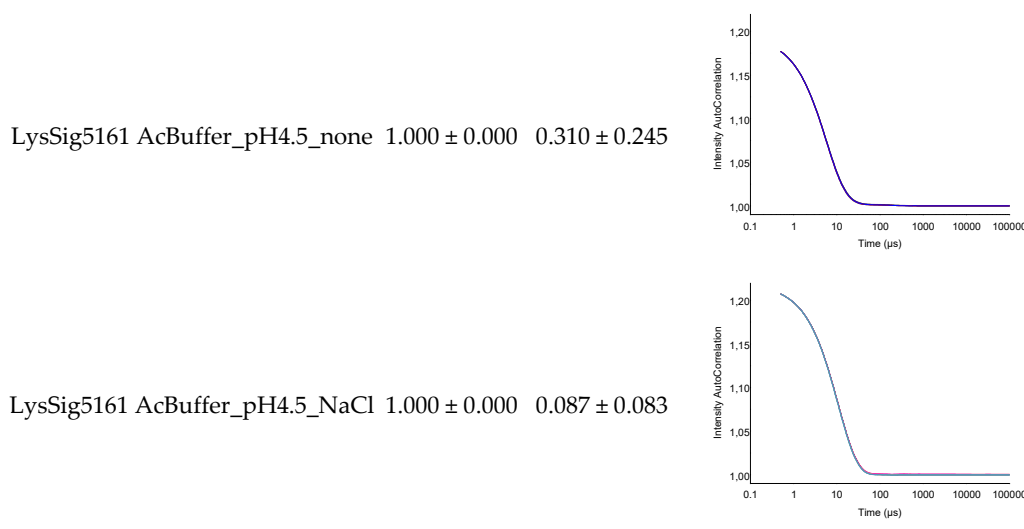

**Table S2.** DLS autocorrelation functions (ACF) for  $k_D$  analysis for peptide-12 in 10 mg/mL concentration in 30 mM acetate buffer pH 4.5 or phosphate buffer pH 6.0 in absence and presence of tonicity agents (glycerol, NaCl). SOS (sum-of-squares) and baseline are parameters for judging the “goodness” of the autocorrelation curves. Composition code is given on left hand side.

| Formulation                         | Baseline      | SOS           | ACF |
|-------------------------------------|---------------|---------------|-----|
| Peptide-12 Ac-Buffer_pH4.5_none     | 1.002 ± 0.007 | 2.256 ± 3.675 |     |
| Peptide-12 Ac-Buffer_pH4.5_glycerol | 1.003 ± 0.003 | 7.537 ± 8.399 |     |
| Peptide-12 Ac-Buffer_pH4.5_NaCl     | 1.002 ± 0.001 | 2.949 ± 6.004 |     |
| Peptide-12 Phos-Buffer_pH6.0_none   | 1.001 ± 0.002 | 1.605 ± 1.739 |     |

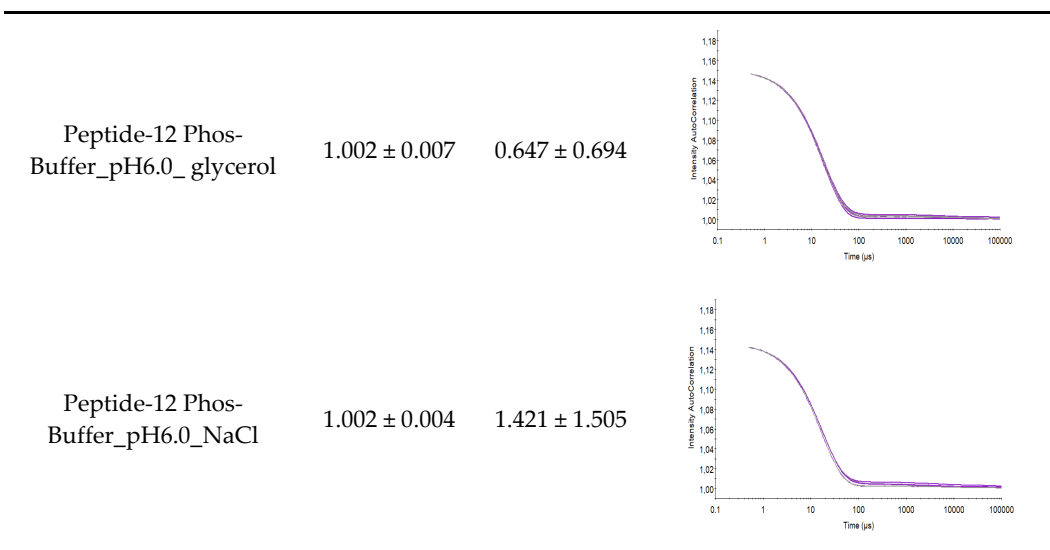

Supplement: pharmaceutics-13-00172-s001.pdf [file pharmaceutics-13-00172-s001.pdf]
